# Supplementary material for: The stem cell regulator PEDF is dispensable for maintenance and function of hematopoietic stem cells
Source: PubMed Central journal article supplement (PMC5579195; doi:10.1038/s41598-017-09452-2), 2017-08-31
Supplement: 41598_2017_9452_MOESM1_ESM.pdf [file 41598_2017_9452_MOESM1_ESM.pdf]

RÖRBY et al.

**The stem cell regulator PEDF is dispensable for maintenance  
and function of hematopoietic stem cells**

Emma Rörby<sup>1</sup>, Matilda Billing<sup>1</sup>, Maria Dahl<sup>1</sup>, Sarah Warsi<sup>1</sup>, Silja Andradottir<sup>1</sup>, Kenichi  
Miharada<sup>1</sup>, Kavitha Siva<sup>1</sup>, Jan-Ingvar Jönsson<sup>2</sup>, Ulrika Blank<sup>1</sup>, Göran Karlsson<sup>3</sup> and  
Stefan Karlsson<sup>1,\*</sup>

**SUPPLEMENTARY INFORMATION**

**Supplementary Figure 1. Efficient knockout of PEDF in mutant mice.** (A) Expression of PEDF receptor (PEDFR) on LT-HSC (LSKCD150+CD48-), MPP (LSKCD150-CD48-) and lineage restricted progenitors (LSKCD150-CD48+) (n=6). (B) PEDF expression in HSCs from PEDF-deficient (KO) or wild type (WT) littermate controls. The figure shows relative mRNA levels normalized to the loading controls (n=3).

Supplementary Figure 1

A PEDFR expression on WT cells

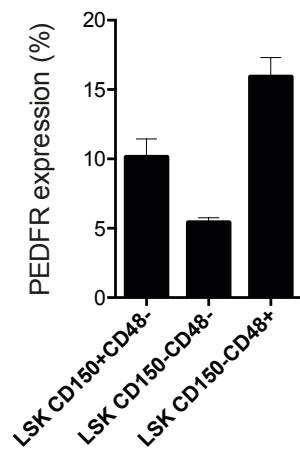

B PEDF expression in LT-HSCs

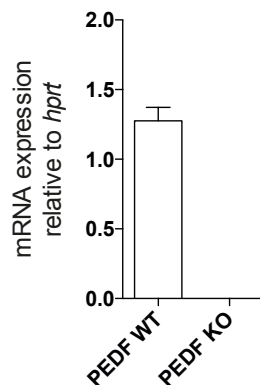

**Supplementary Figure 2. PEDF expression in human CB cells.** (A) Wild type cells were sorted for Lin-CD38-CD34+CD45RA-CD90+CD49f+ (HSC), Lin-CD38-CD34+CD45RA-CD90- (MPP) and Lin-CD38-CD34+CD45RA+CD90- (Myeloid Lymphoid progenitors; MLP) and PEDF mRNA expression was measured by qPCR. Line shows mean expression  $\pm$  SEM (n=3).

Supplementary Figure 2

A

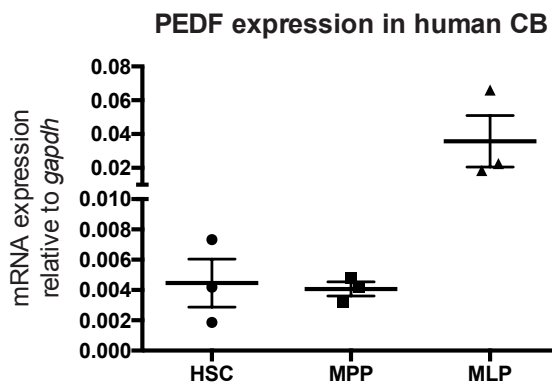

Supplementary Table 1. FACS antibodies.

|              |                  |                          |
|--------------|------------------|--------------------------|
| Annexin-V    | PE               | BD Bioscience            |
| B220         | PECy5, FITC      | BioLegend                |
| CD3          | PECy5, PE        | BioLegend                |
| CD4          | PECy5            | BioLegend                |
| CD8          | PECy6            | BioLegend                |
| CD9          | FITC, PE         | BioLegend                |
| CD34         | Biotin           | eBioscience              |
| CD45.1       | PE, PECy7, PerCP | BioLegend                |
| CD45.2       | APC              | BioLegend                |
| CD48         | FITC             | BioLegend                |
| CD150        | PECy7            | BioLegend                |
| Flt3         | PE               | BioLegend                |
| Gr-1         | PECy5, FITC      | BioLegend                |
| Mac-1        | PECy5, FITC      | BioLegend                |
| Sca-1        | PacBlue, PECy7   | BD Pharmingen, BioLegend |
| Streptavidin | Qdot605          | BioLegend                |
| PEDFR        | PE               | R&D Systems              |
| Ter119       | PECy5            | BioLegend                |
| human CD2    | PECy5            | Biolegend                |
| human CD3    | PECy5            | Biolegend                |
| human CD14   | PECy5            | EBioscience              |
| human CD16   | PECy5            | Biolegend                |
| human CD19   | PECy5            | Biolegend                |
| human CD34   | FITC             | Biolegend                |
| human CD38   | APC              | BioLegend                |
| human CD45RA | APC-Cy7          | Biolegend                |
| human CD49f  | PECy7            | eBioscience              |
| human CD56   | PECy5            | BioLegend                |
| human CD90   | PE               | BioLegend                |
| human CD123  | PECy5            | BioLegend                |
| human CD235a | PECy5            | BD bioscience            |
